# Supplementary material
Source: PubMed Central journal article supplement (PMC3405545)
Supplement: NIHMS369995-supplement-Supp_Fig_S1-S3.pdf [file NIHMS369995-supplement-Supp_Fig_S1-S3.pdf]

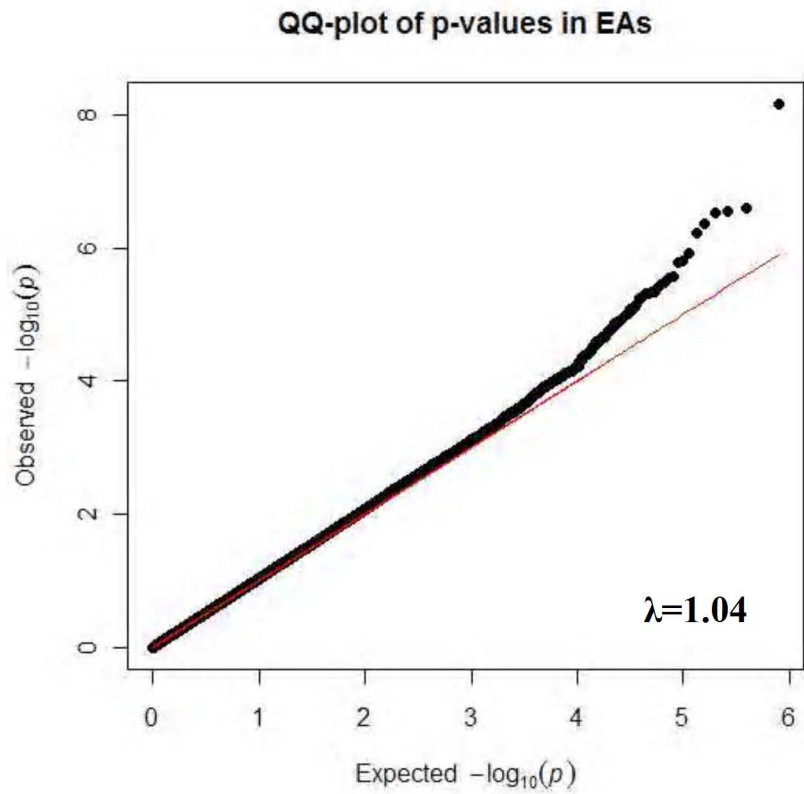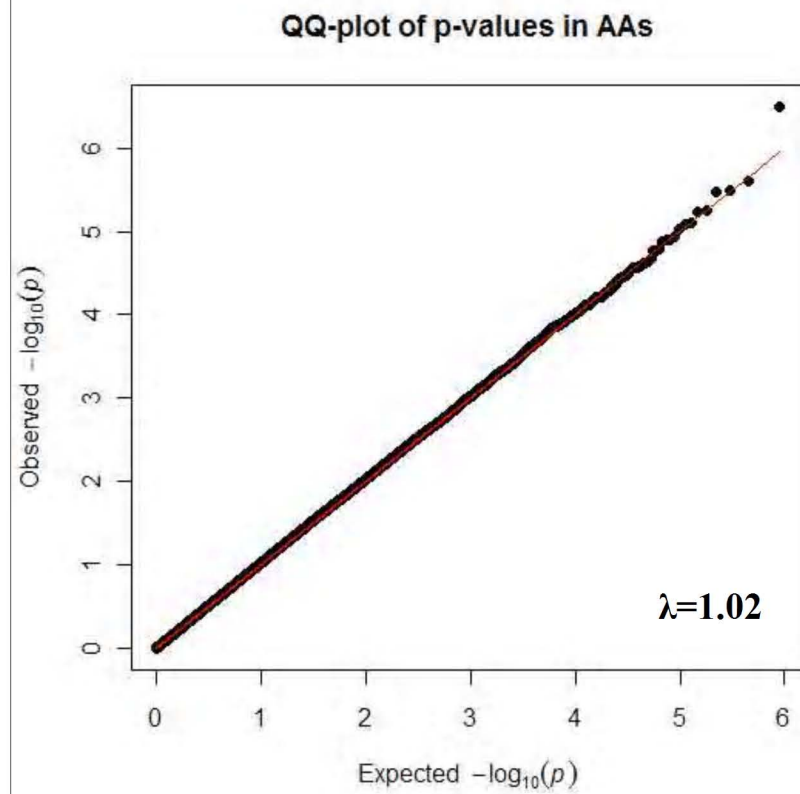

Supplemental Figure S1. QQ-plot for the p-values in EAs and AAs

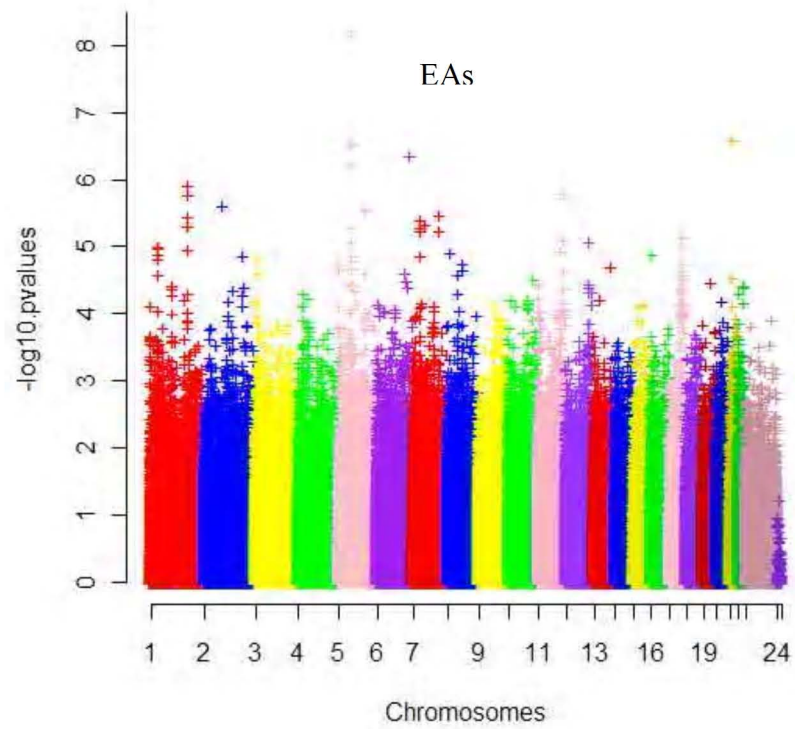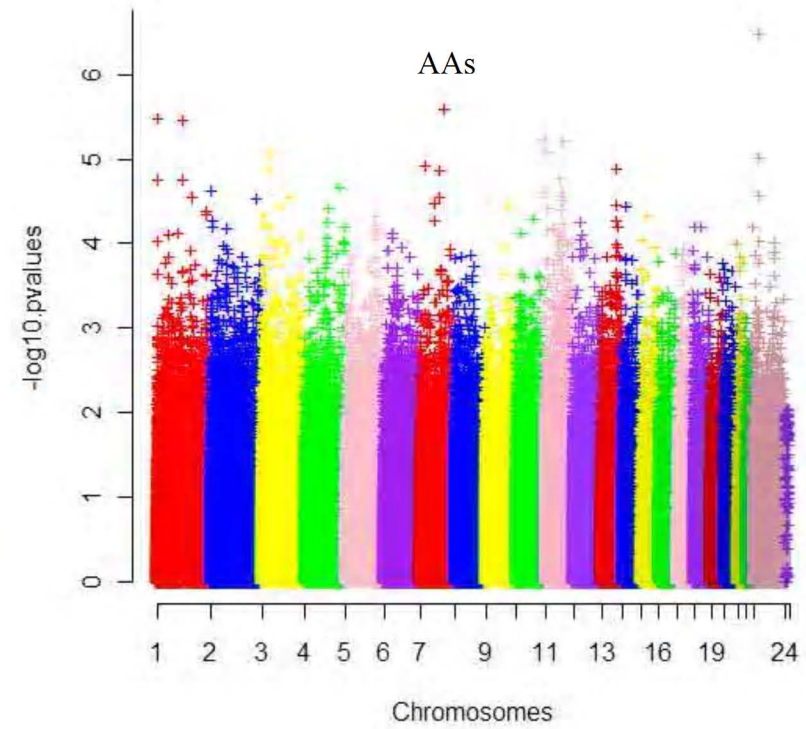

**Supplemental Figure S2. Manhattan plots for the p-values in EAs and AAs**

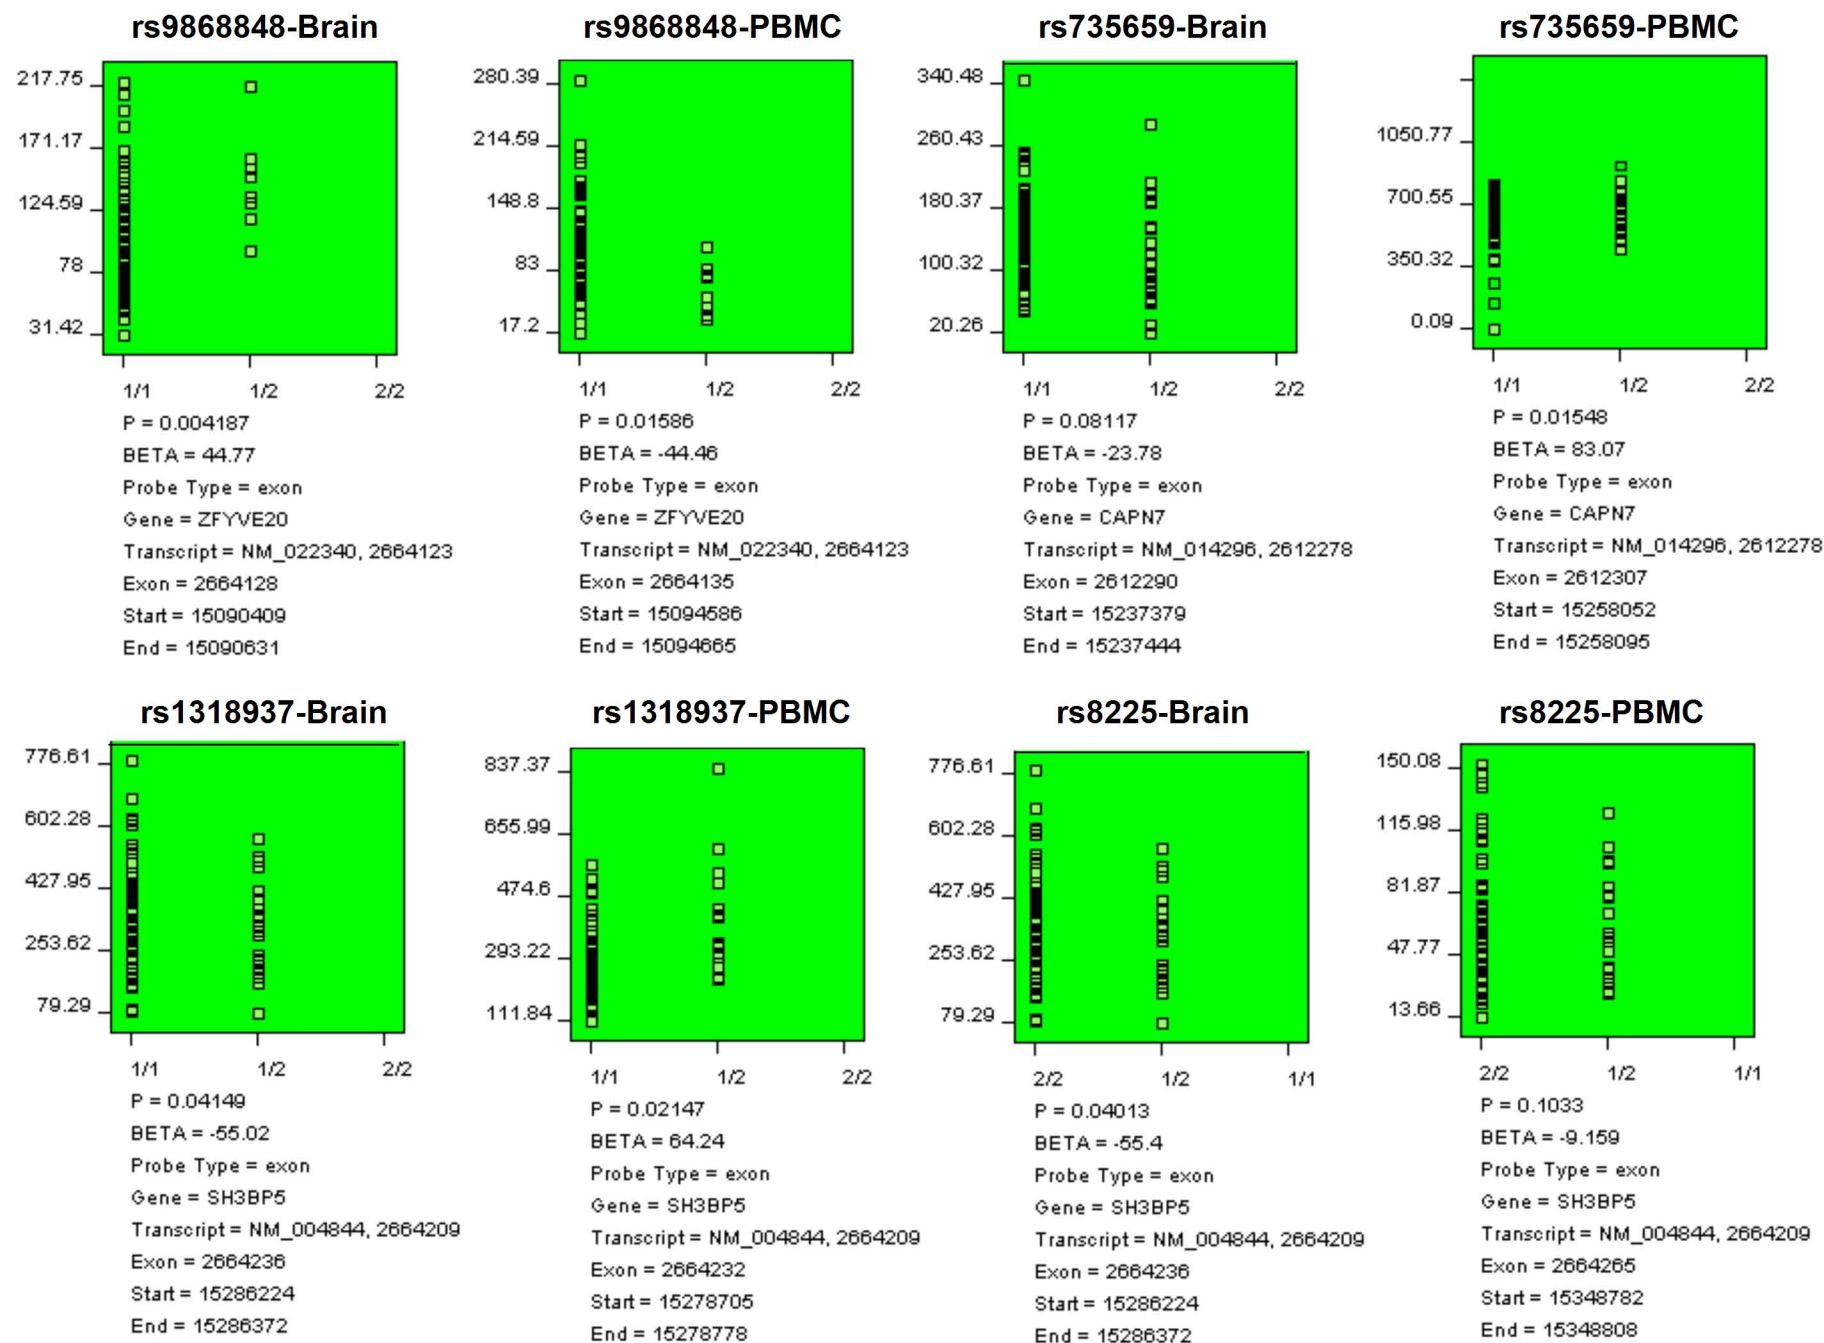

**Supplemental Figure S3. Associations between replicable risk SNPs and exon expression levels**
